# Supplementary material for: Effectiveness of Volatile Natural Deep Eutectic Solvents (VNADESs) for the Green Extraction of Chelidonium majus Isoquinoline Alkaloids
Source: MDPI journal article supplement (doi:10.3390/molecules27092815), 2022-04-28
Supplement: s1 [file s1]

Supplementary Materials

# Effectiveness of volatile natural deep-eutectic solvents (VNADES) for the green extraction of *Chelidonium majus* isoquinoline alkaloids

Maciej Strzemiński<sup>1,\*</sup>, Sławomir Dresler<sup>1,2</sup>, Beata Podkościelna<sup>3</sup>, Kamil Skic<sup>4</sup>, Ireneusz Sowa<sup>1</sup>, Daniel Załuski<sup>5</sup>, Rob Verpoorte<sup>6</sup>, Sylwia Zielińska<sup>7</sup>, Paweł Krawczyk<sup>8</sup>, and Magdalena Wójcik<sup>1,\*</sup>

<sup>1</sup> Department of Analytical Chemistry, Medical University of Lublin, 4A Chodźki Str., 20-093 Lublin, Poland; [slawomir.dresler@umlub.pl](mailto:slawomir.dresler@umlub.pl) (S.D.); [i.sowa@umlub.pl](mailto:i.sowa@umlub.pl) (I.S.)

<sup>2</sup> Department of Plant Physiology and Biophysics, Institute of Biological Science, Maria Curie-Skłodowska University, 19 Akademicka Str. 20-033 Lublin, Poland

<sup>3</sup> Faculty of Chemistry, Institute of Chemistry, Maria Curie-Skłodowska University, 2 Marii Curie-Skłodowskiej Str., 20-031 Lublin, Poland; [beata-pod@poczta.umcs.lublin.pl](mailto:beata-pod@poczta.umcs.lublin.pl) (B.P.)

<sup>4</sup> Institute of Agrophysics, Polish Academy of Sciences, 4 Doświadczalna Str., 20-290 Lublin, Poland; [k.skic@ipan.lublin.pl](mailto:k.skic@ipan.lublin.pl) (K.S.)

<sup>5</sup> Department of Pharmaceutical Botany and Pharmacognosy, Ludwik Rydygier Collegium Medicum, Nicolaus Copernicus University, 9 Marie Curie-Skłodowska Street, 85-094, Bydgoszcz, Poland; [daniel.zaluski@cm.umk.pl](mailto:daniel.zaluski@cm.umk.pl) (D.Z.)

<sup>6</sup> Natural Products Laboratory, Institute of Biology, Leiden University, 2300RA Leiden, the Netherlands; [verpoort@chem.leidenuniv.nl](mailto:verpoort@chem.leidenuniv.nl) (R.V.)

<sup>7</sup> Department of Pharmaceutical Biology and Biotechnology, Division of Pharmaceutical Biotechnology, Wrocław Medical University, 50-556 Wrocław, Poland; [sylwia.zielinska@umed.wroc.pl](mailto:sylwia.zielinska@umed.wroc.pl) (S.Z.)

<sup>8</sup> Immunology and Genetics Laboratory, Department of Pneumology, Oncology and Allergology, Medical University of Lublin, 20-093 Lublin, Poland; [krapa@poczta.onet.pl](mailto:krapa@poczta.onet.pl) (P.K.)

\* Correspondence: [maciej.strzemski@poczta.onet.pl](mailto:maciej.strzemski@poczta.onet.pl) (M.S.); [magdalenawojcik@umlub.pl](mailto:magdalenawojcik@umlub.pl) (M.W.)

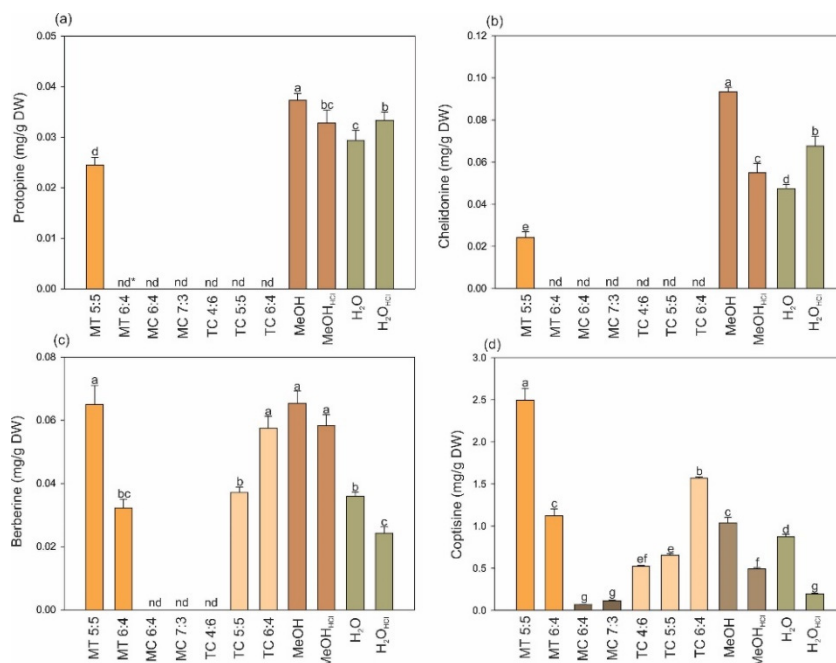

**Figure S1.** Yields of extraction of isoquinoline alkaloids from *Chelidonium majus* shoots with volatile natural deep-eutectic solvents and commonly used extractants. MT – menthol-thymol mixtures; MC – menthol-camphor mixtures; TC – thymol-camphor mixtures. The mass:mass ratio of the components in the mixtures is shown next to the symbols. MeOH/HCl and H<sub>2</sub>O/HCl – MeOH and water acidified with hydrochloric acid to a concentration of 0.05 M. Data are mean ± SE (n = 5); values for individual raw materials followed by the same letter are not significantly different (p < 0.05, Tukey's test).

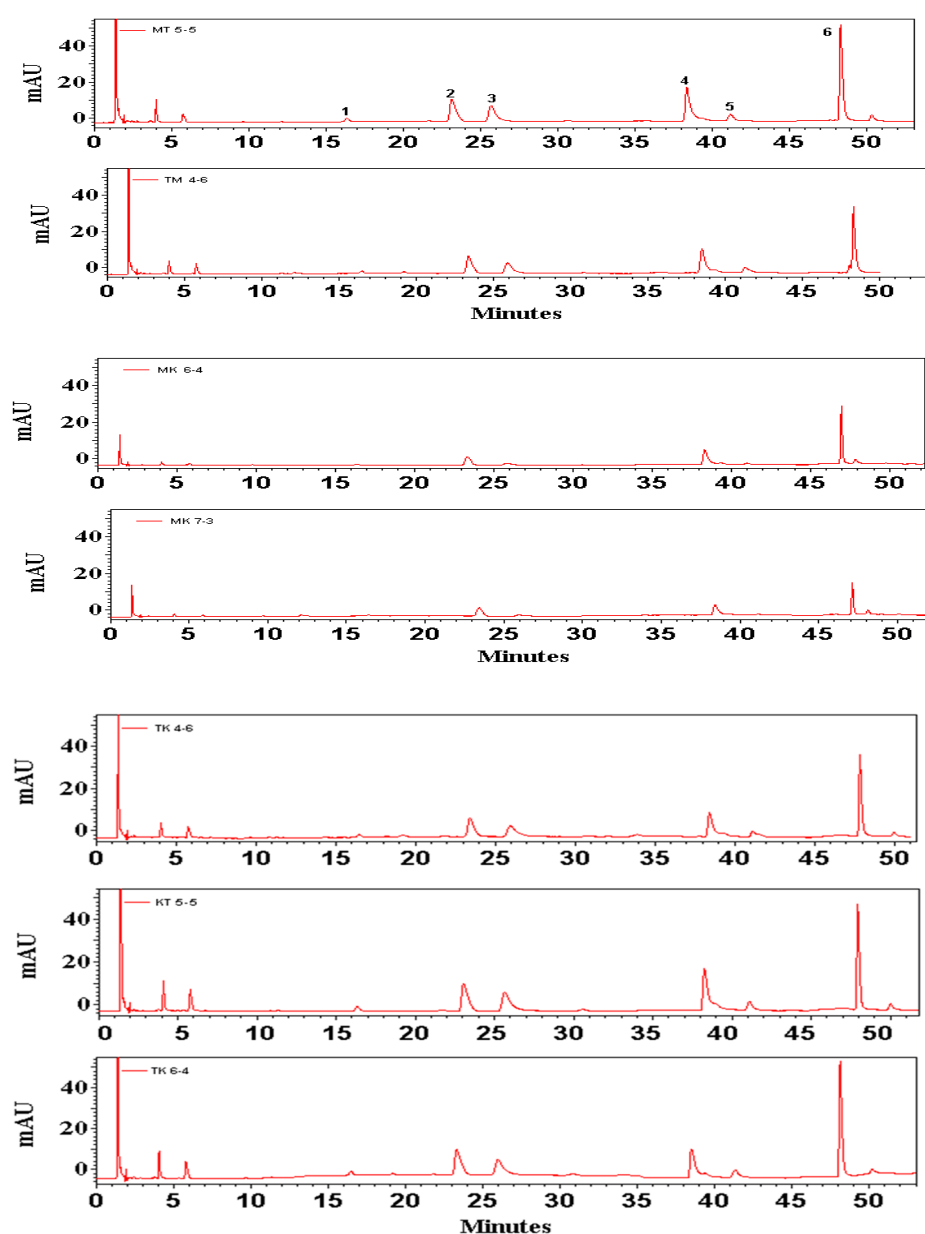

**Figure S2.** Examples of HPLC-DAD chromatograms of extracts obtained with VNADES ( $\lambda=254$  nm); 1- protopine, 2- chelidoniumine 3- coptisine 4- sanguinarine 5- berberine 6- chelerythrine. IA were determined using the methodology published previously [1]: VWR Hitachi Chromaster 600 chromatograph with a spectrophotometric detector (DAD) and EZChrom Elite software (Merck) was used for chromatographic analysis. The samples were analyzed on XB-C18 reversed-phase core-shell column (Kinetex, Phenomenex, Aschaffenburg, Germany) (25 cm  $\times$  4.6 mm i.d., 5  $\mu$ m particle size) using mixture of: acetonitrile (solvent A) and 10mM water solution of ammonium acetate adjusted to pH 4 with acetic acid (solvent B) as mobile phase, at temperature of 30  $^{\circ}$ C and eluent flow rate 1.2 mL $\cdot$ min $^{-1}$  according to gradient program: A 20%, B 80% during 0-20 min, A 25%, B 75 % during 20-27 min and next A 30%, B 70% during 27- 60 min.

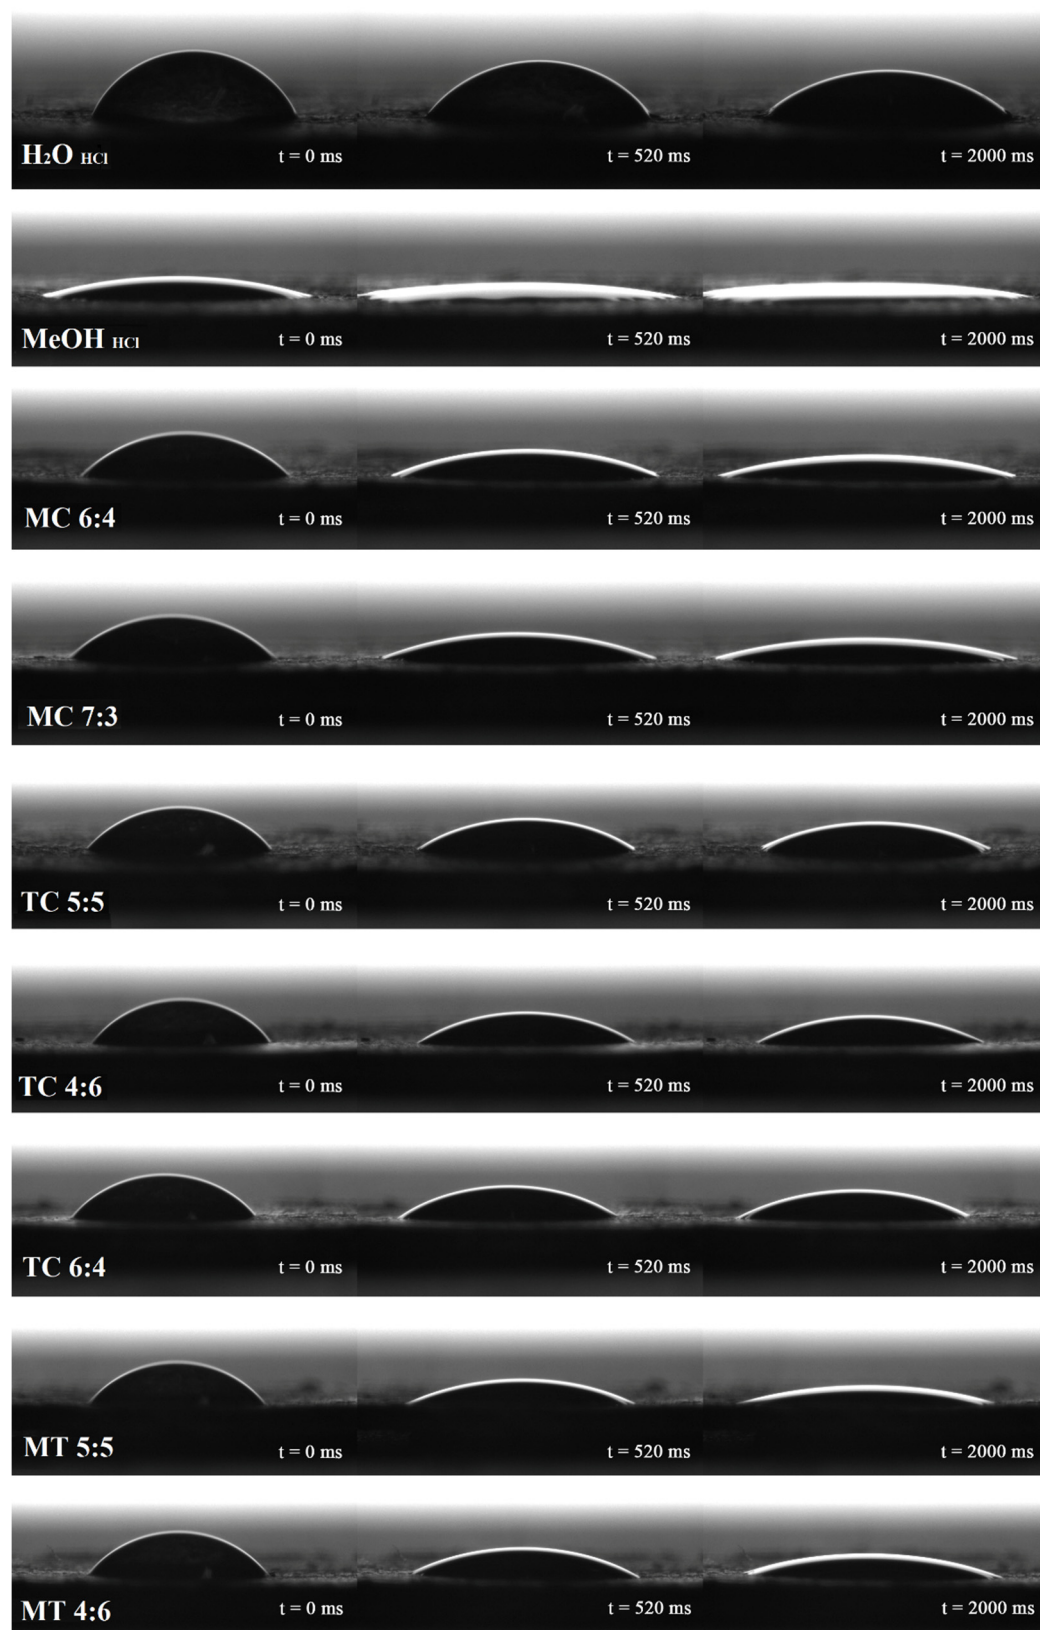

**Figure S3.** The photographs of drops of applied extractants on the surface of the root *Chelidonium majus*.

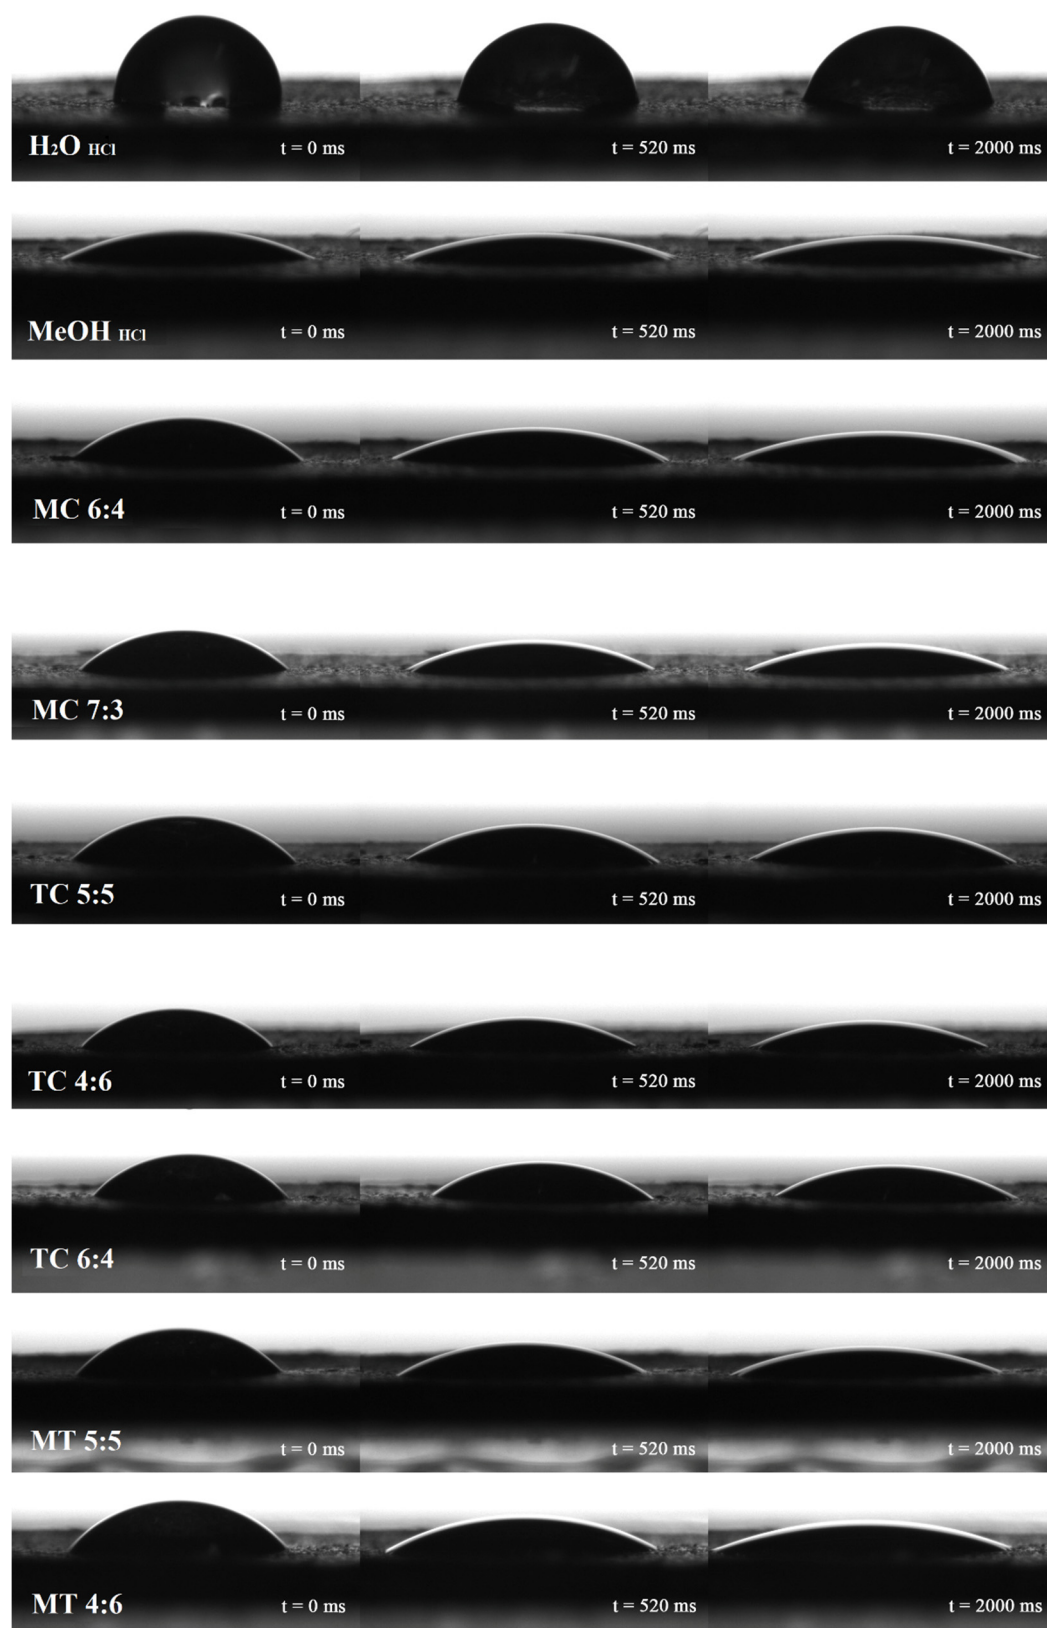

**Figure S4.** The photographs of drops of applied extractants on the surface of the herb *Chelidonium majus*.

---

## References

1. Wójciak-Kosior, M.; Sowa, I.; Dresler, S.; Kováčik, J.; Staniak, M.; Sawicki, J.; Zielińska, S.; Świeboda, R.; Strzemski, M.; Kocjan, R. Polyaniline based material as a new SPE sorbent for pre-treatment of *Chelidonium majus* extracts before chromatographic analysis of alkaloids. *Talanta* **2019**, *194*, 32–37, doi:10.1016/j.talanta.2018.10.009.
